# Supplementary material for: UGCG influences glutamine metabolism of breast cancer cells
Source: PubMed Central journal article supplement (PMC6821892; doi:10.1038/s41598-019-52169-7), 2019-10-30
Supplement: 41598_2019_52169_MOESM1_ESM.pdf [file 41598_2019_52169_MOESM1_ESM.pdf]

## **UGCG influences glutamine metabolism of breast cancer cells**

Nina Schömel<sup>1</sup>, Sarah E. Hancock<sup>2</sup>, Lisa Gruber<sup>1</sup>, Ellen M. Olzomer<sup>3</sup>, Frances L. Byrne<sup>3</sup>, Divya Shah<sup>3</sup>, Kyle L. Hoehn<sup>3</sup>, Nigel Turner<sup>2</sup>, Sabine Grösch<sup>1</sup>, Gerd Geisslinger<sup>1,4</sup>, Marthe-Susanna Wegner<sup>1</sup>

<sup>1</sup>*pharmazentrum frankfurt/ZAFES*, Institute of Clinical Pharmacology, Johann Wolfgang Goethe University, Theodor Stern-Kai 7, 60590 Frankfurt am Main, Germany.

<sup>2</sup>School of Medical Sciences, University of New South Wales, Sydney, New South Wales 2052, Australia.

<sup>3</sup>School of Biotechnology and Biomolecular Sciences, University of New South Wales, Sydney, New South Wales 2052, Australia.

<sup>4</sup>Fraunhofer Institute for Molecular Biology and Applied Ecology IME, Project Group Translational Medicine and Pharmacology (TMP), Theodor Stern-Kai 7, 60590 Frankfurt am Main, Germany.

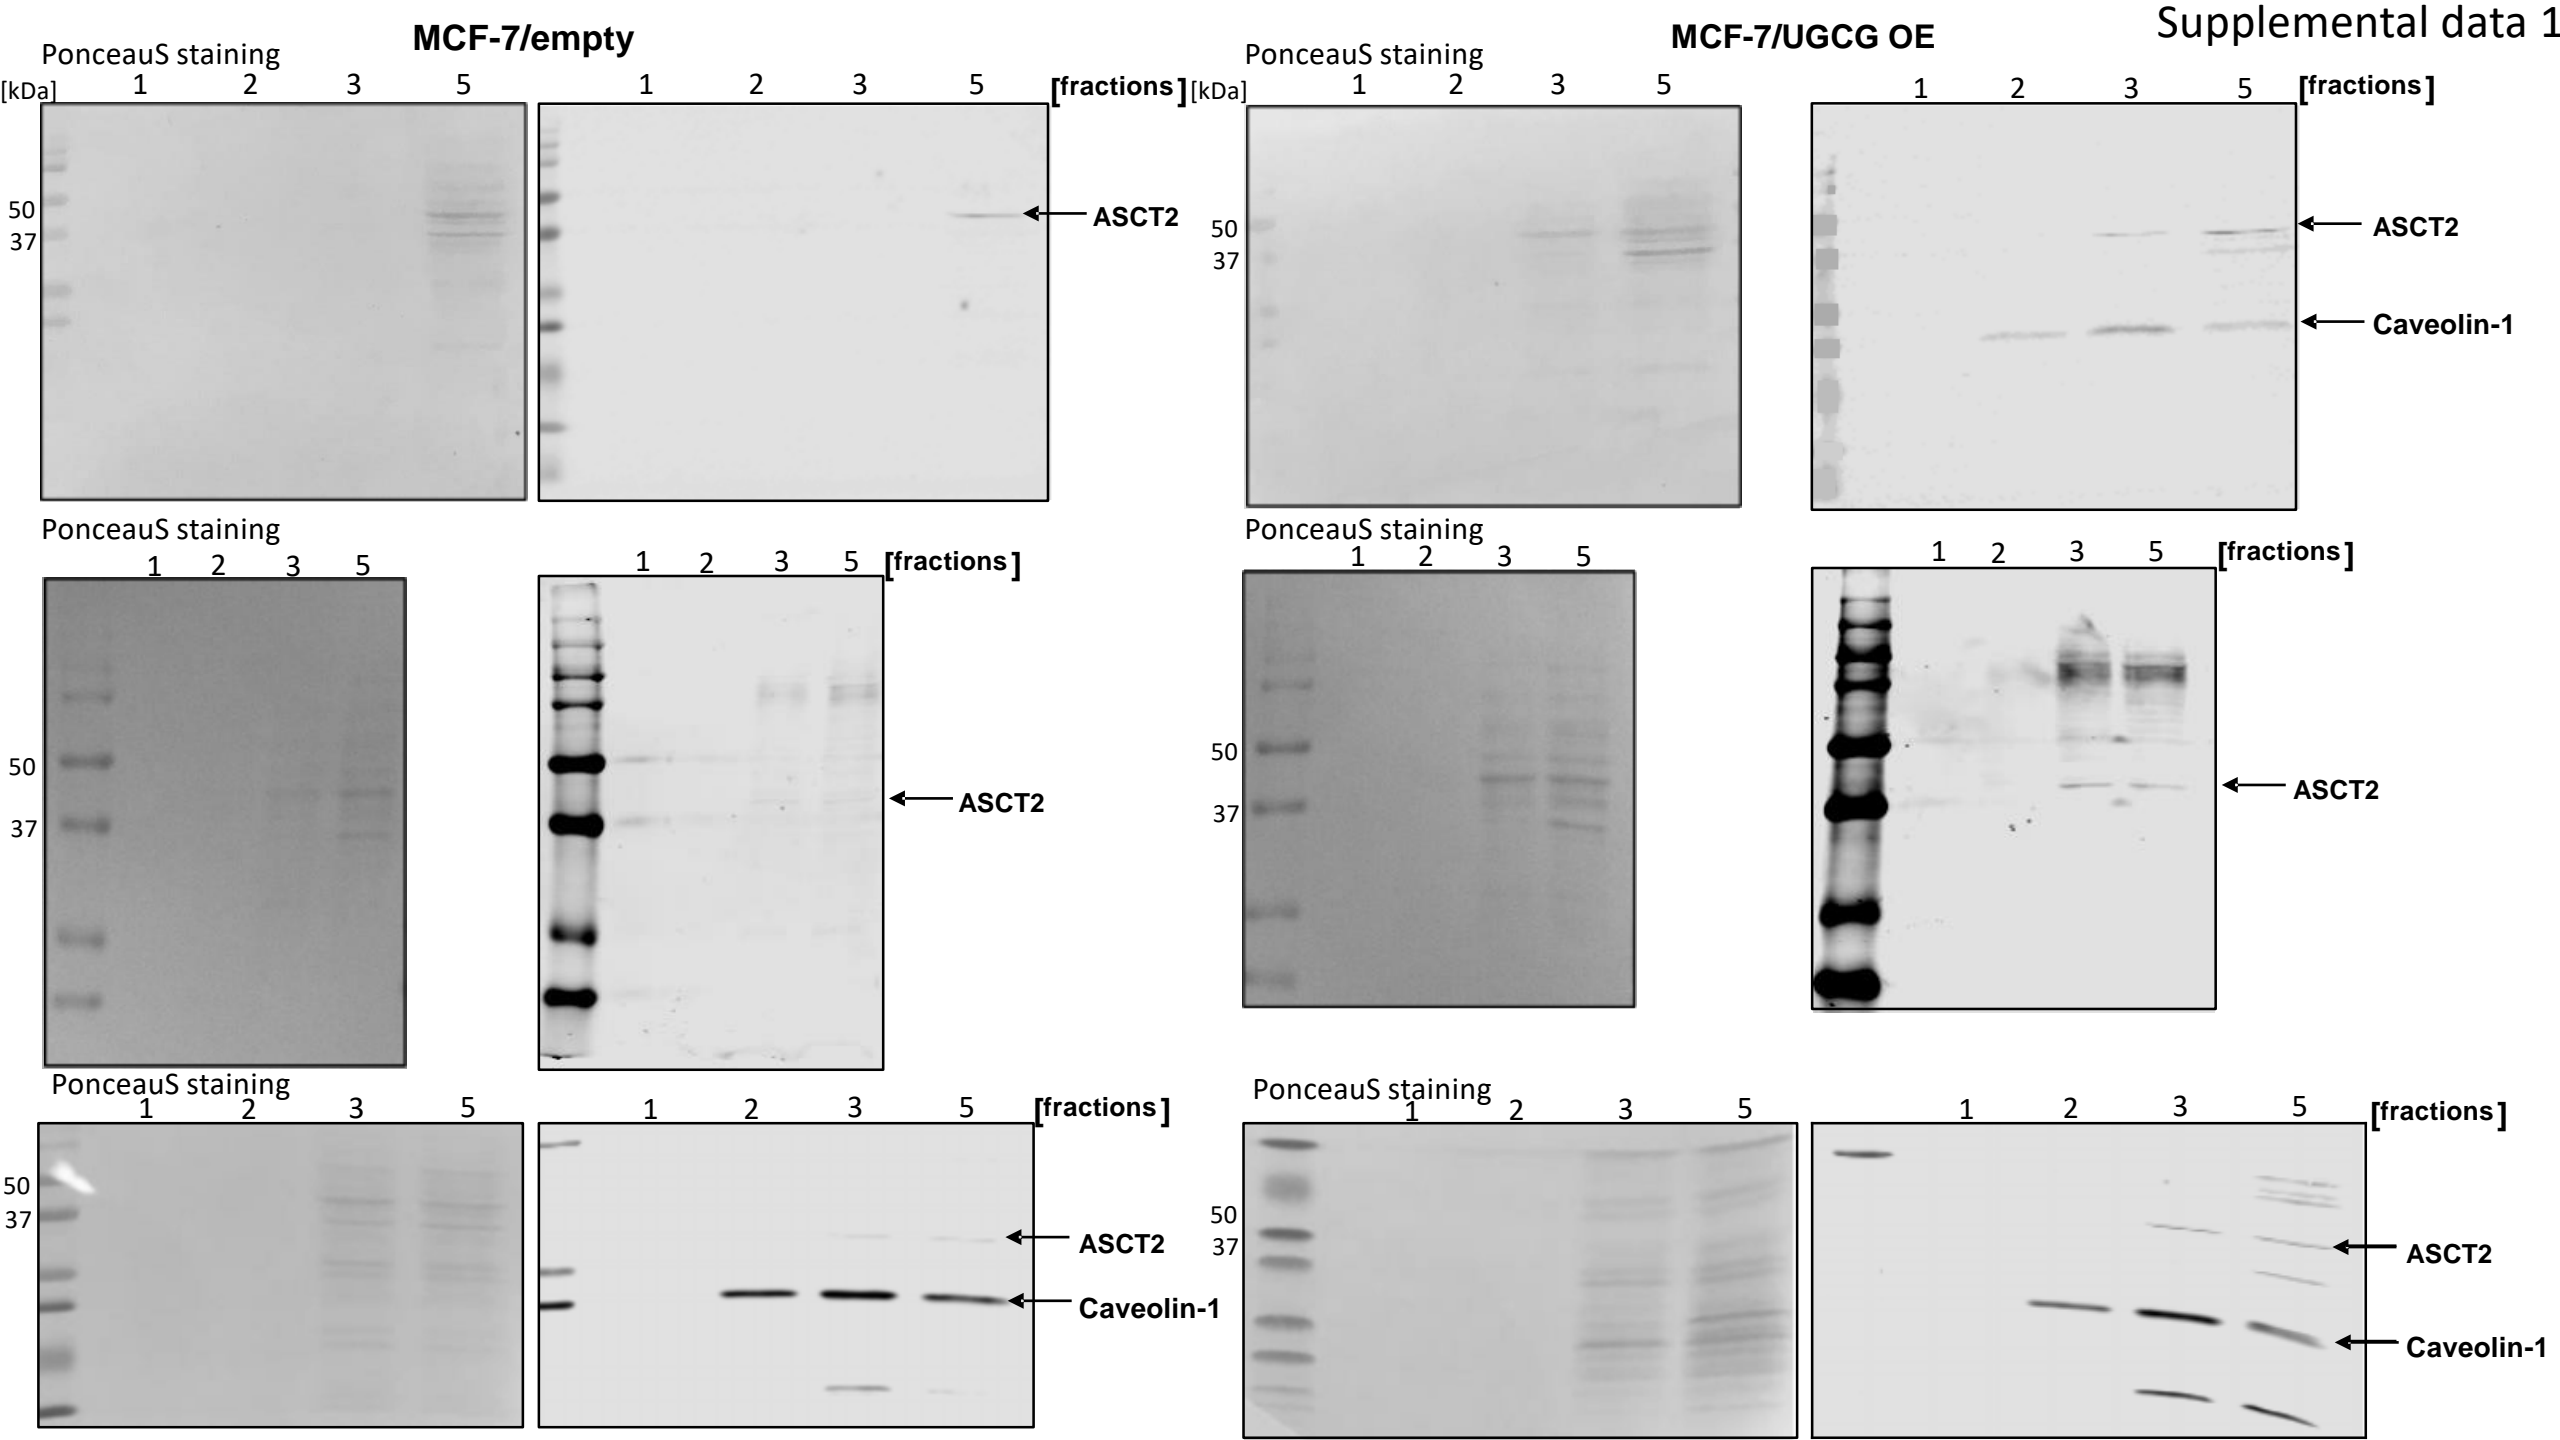

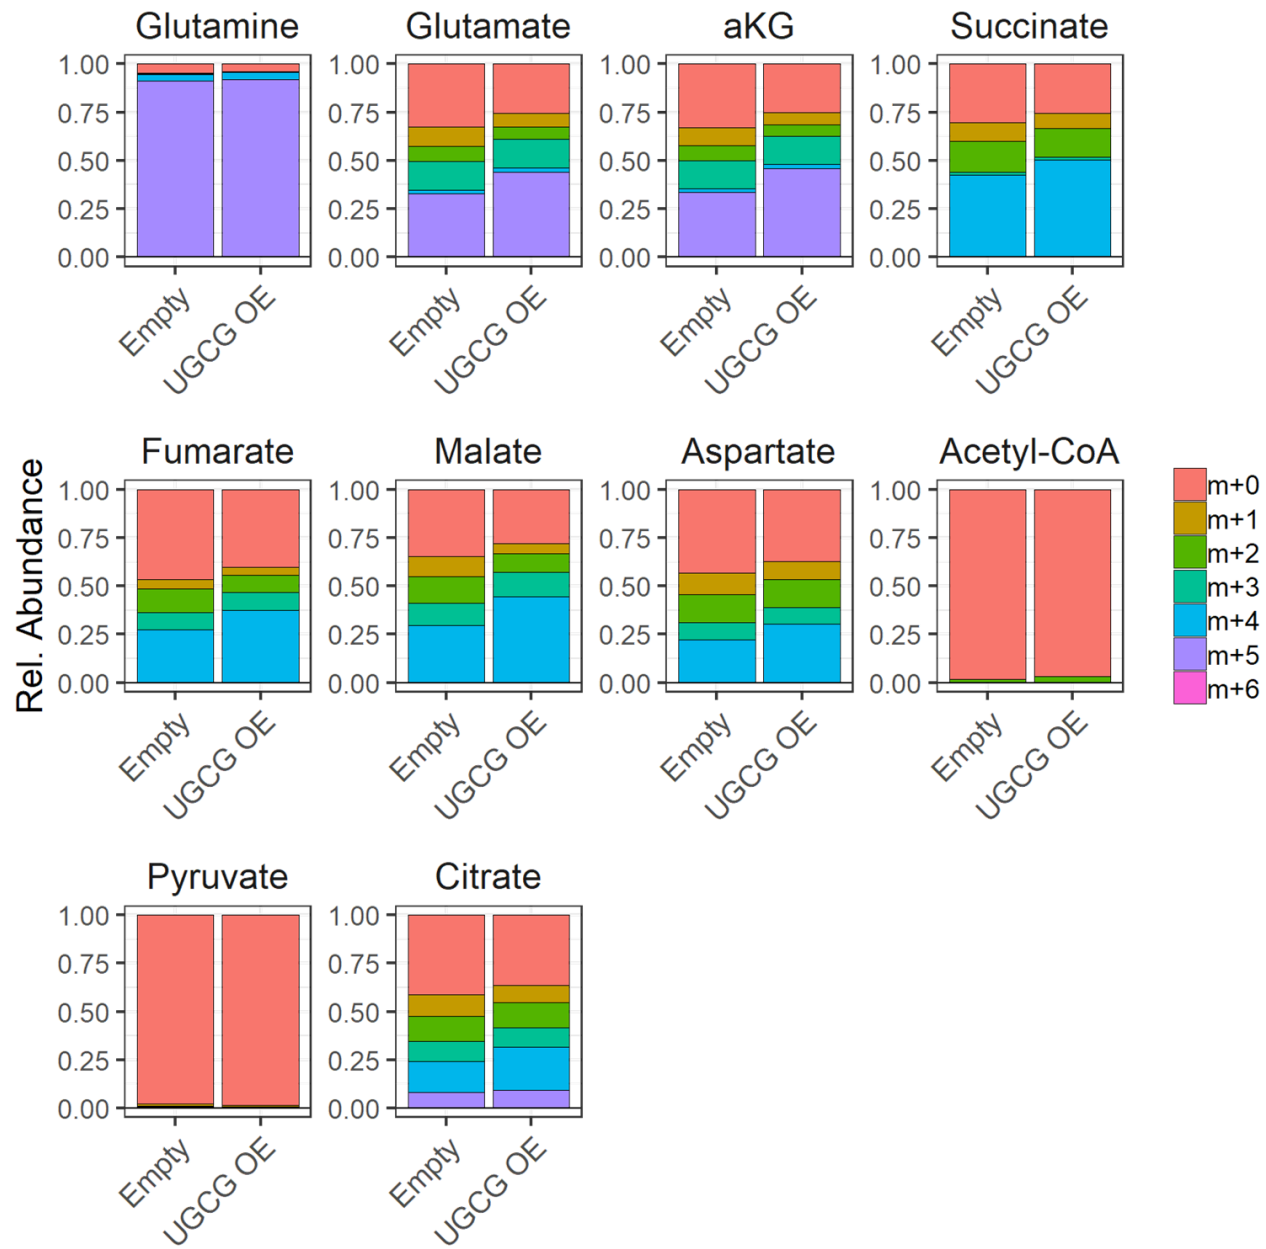

**UGCG overexpression impact on glutamine oxidation.** Ions distribution following  $^{13}\text{C}_5$ -glutamine supplementation for 16 hours in MCF-7/empty and MCF-7/UGCG OE cells.

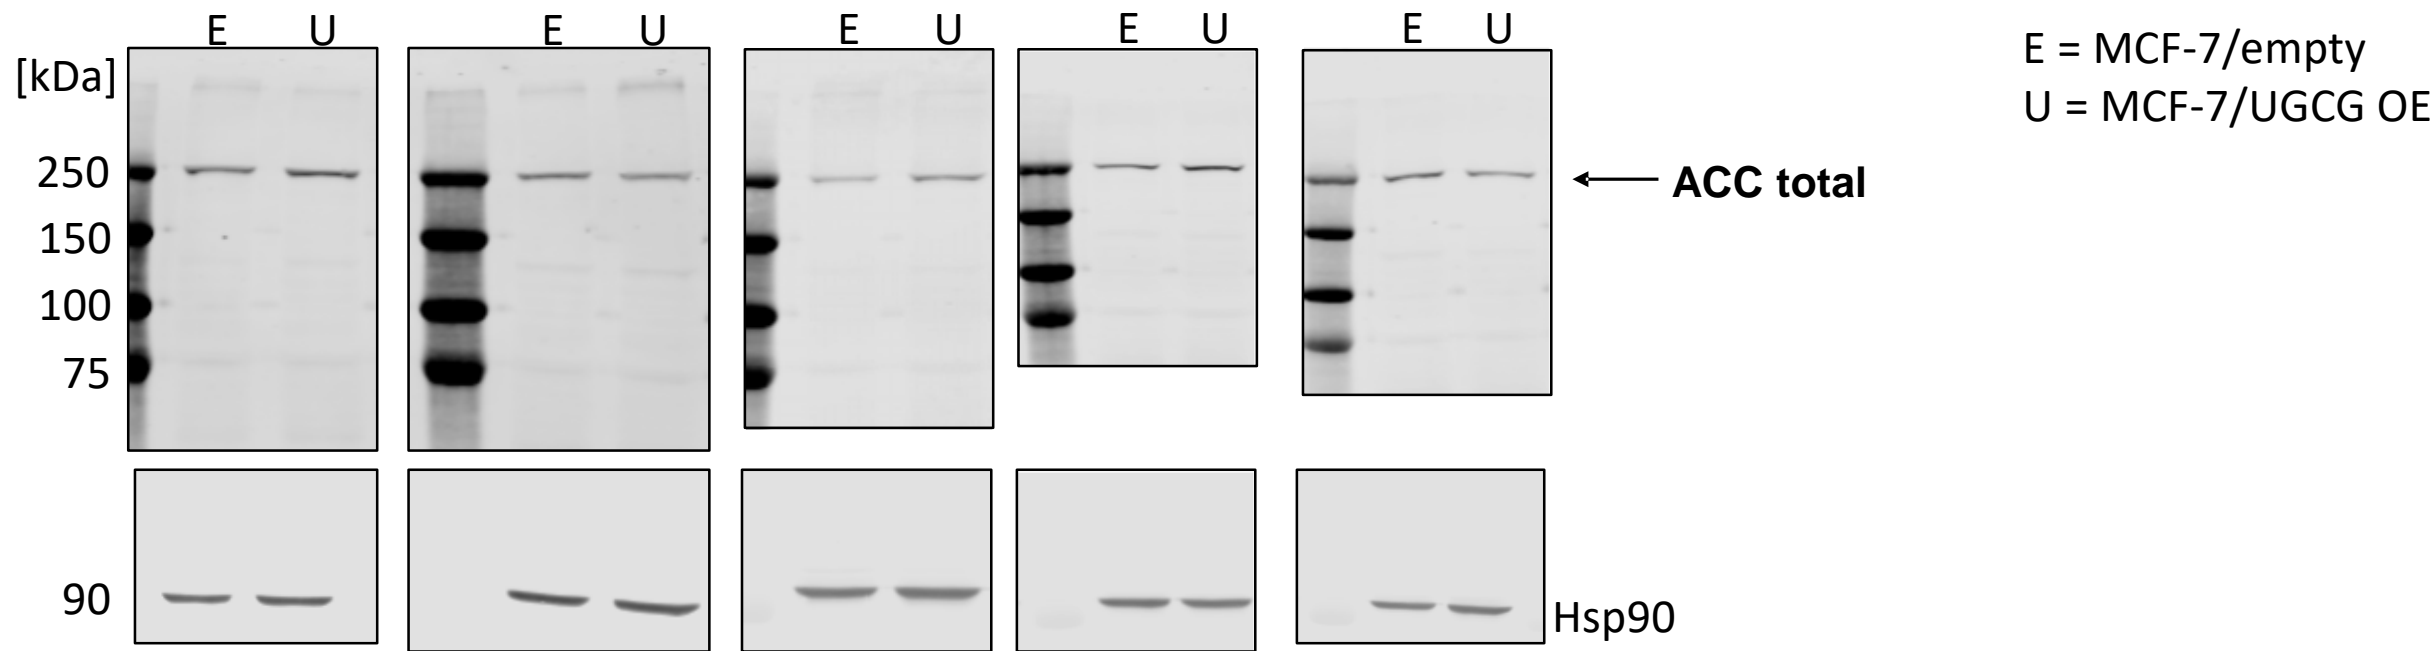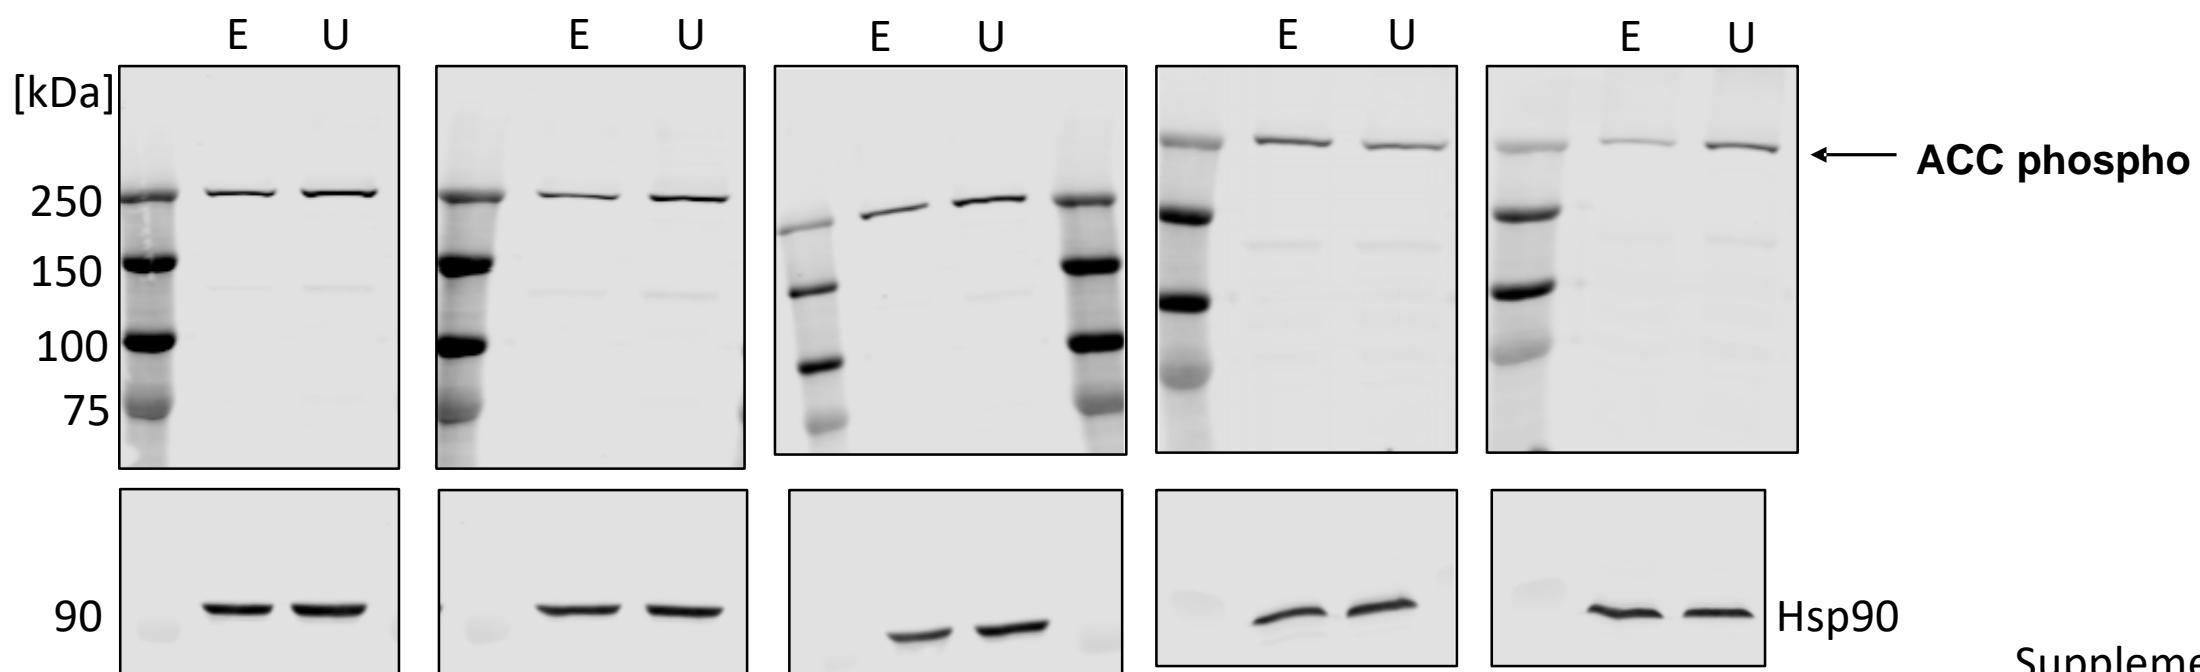

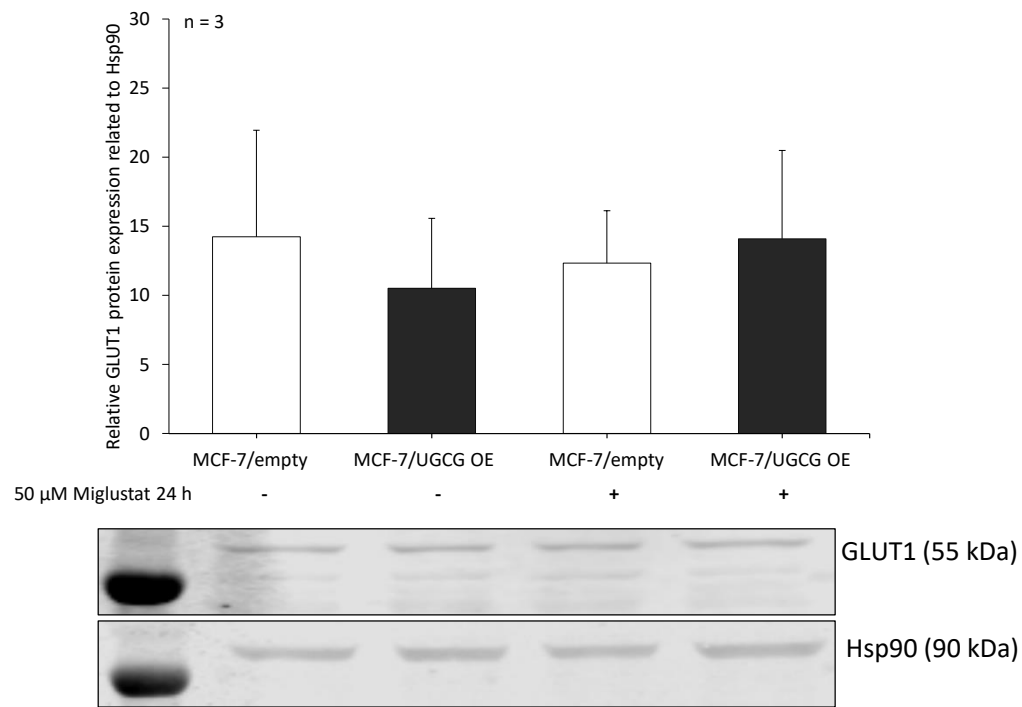

**GLUT1 protein levels are unchanged in UGCG overexpressing MCF-7 whole cell lysate. A** Investigation of GLUT1 protein levels by Western blot analysis. (Control and treatment with 50 μM Miglustat for 24 h to inhibit UGCG activity). The protein expression is related to the housekeeping protein Hsp90. Data are presented as a mean of  $n=3 \pm \text{SEM}$ . One respective blot is displayed.

**Material and Methods: Analysis of GLUT1 protein expression by Western blot.** For the analysis of GLUT1 levels, cells were treated with the UGCG inhibitor Miglustat (50 μM, 24 h). Untreated and Miglustat treated cells were harvested and resuspended in PhosphoSafe™ buffer (EMD Chemicals, Inc. La Jolla, USA) supplemented with 2 mM DTT (AppliChem GmbH, Darmstadt, Germany) and 1x Roche Complete (Roche, Mannheim, Germany), pH 7.4. After sonication and centrifugation, (14,000 x g, 10 min, 4 °C), the total protein concentration was determined by Bradford method. Subsequent steps were performed as described in chapter 8. GLUT1 antibody was purchased from Santa Cruz (GLUT1(A-4): sc-377228, Dallas, USA).

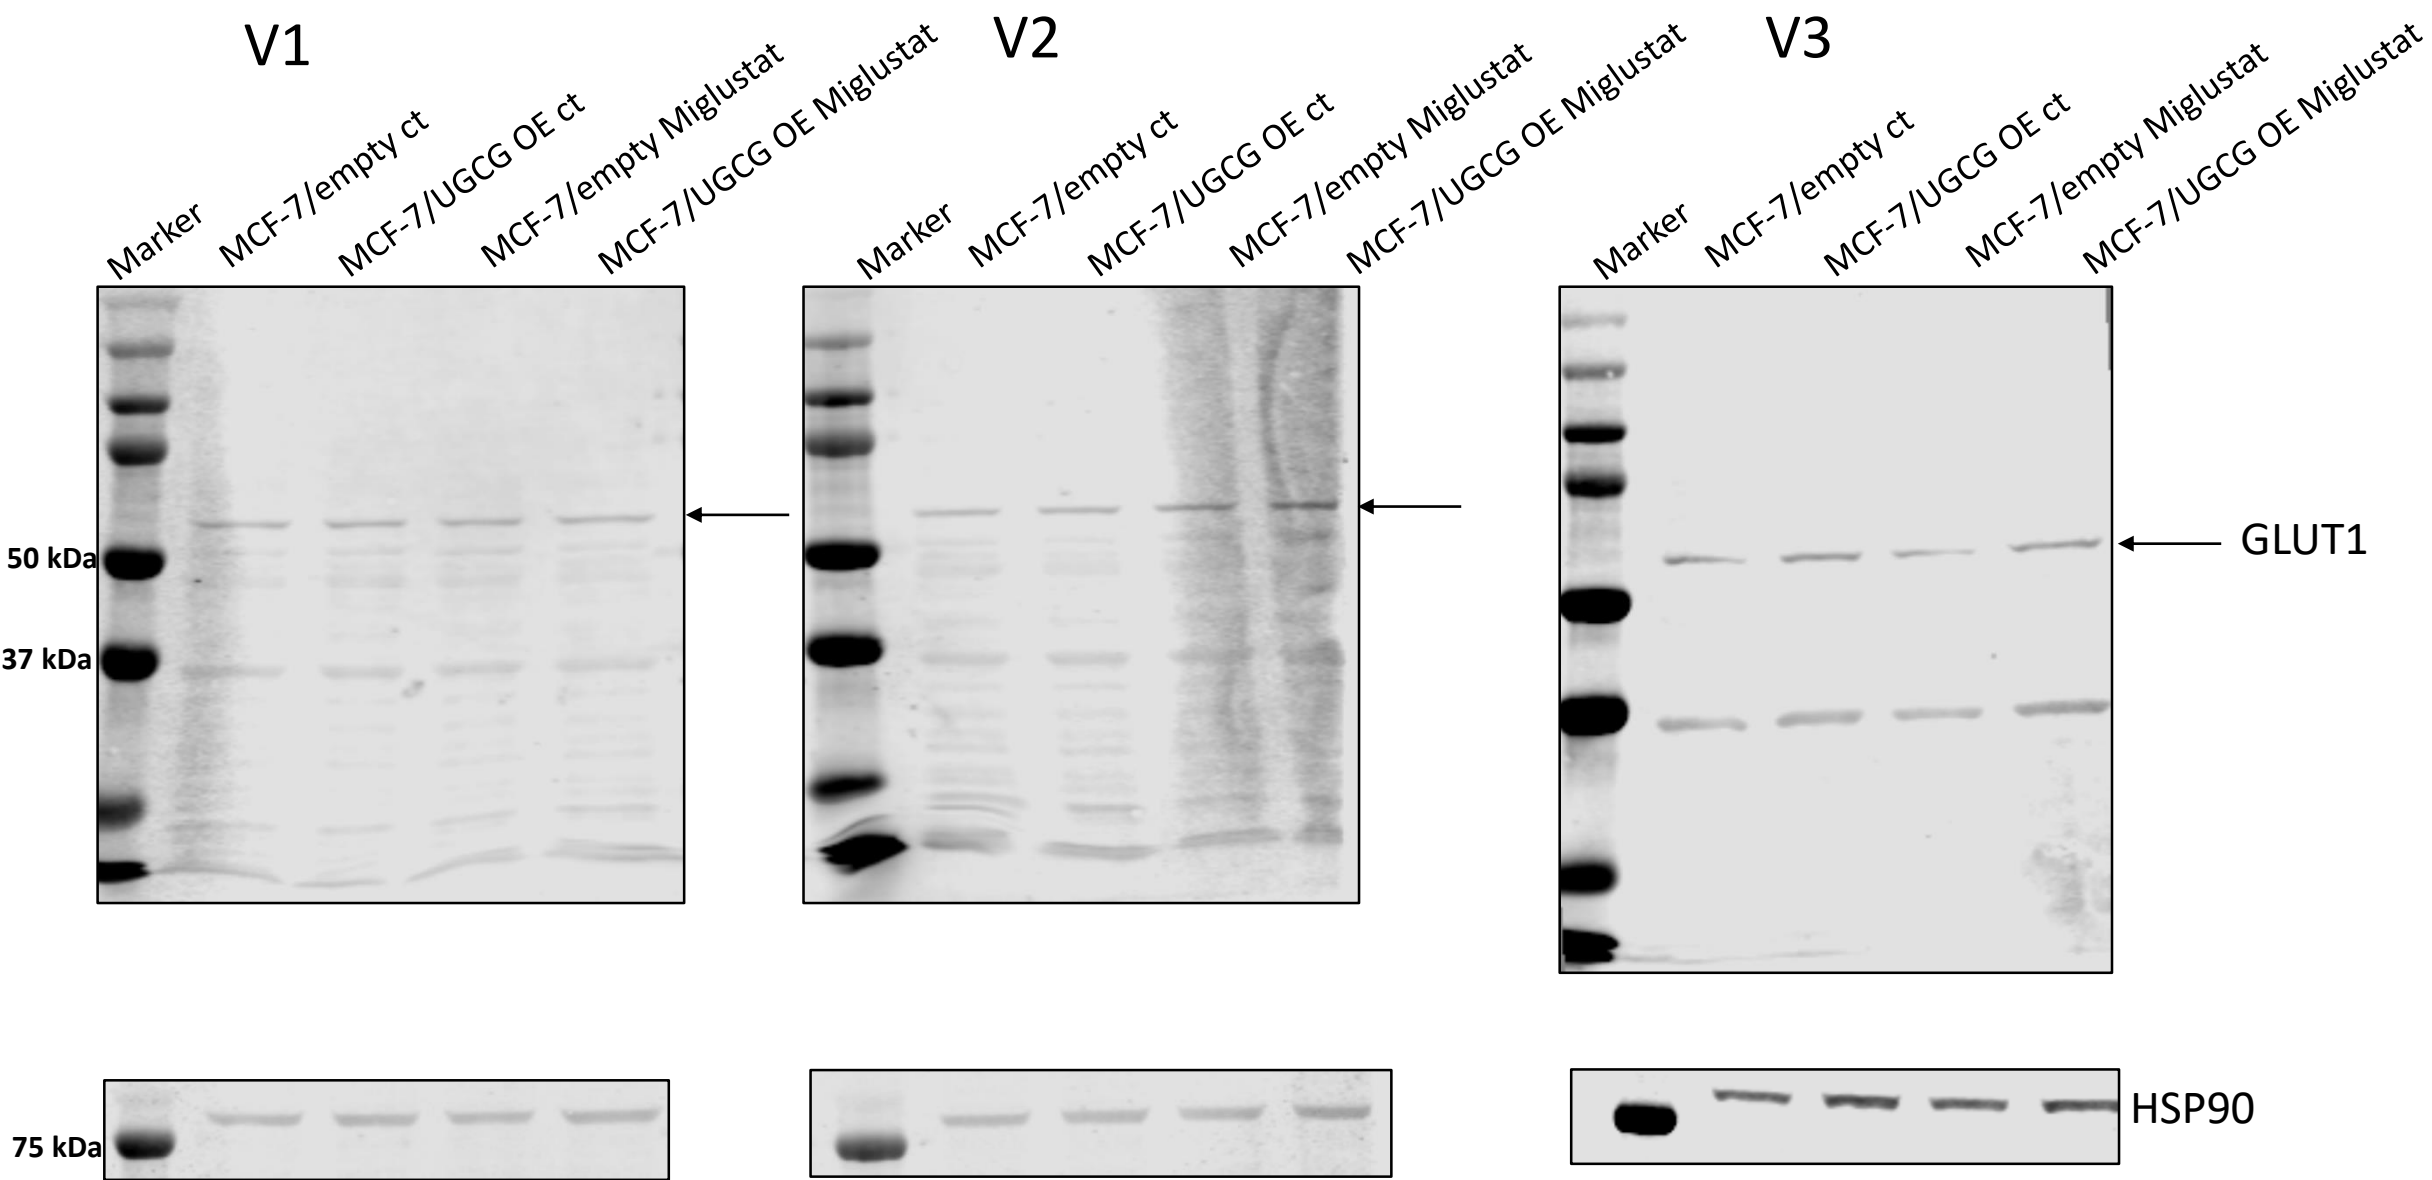

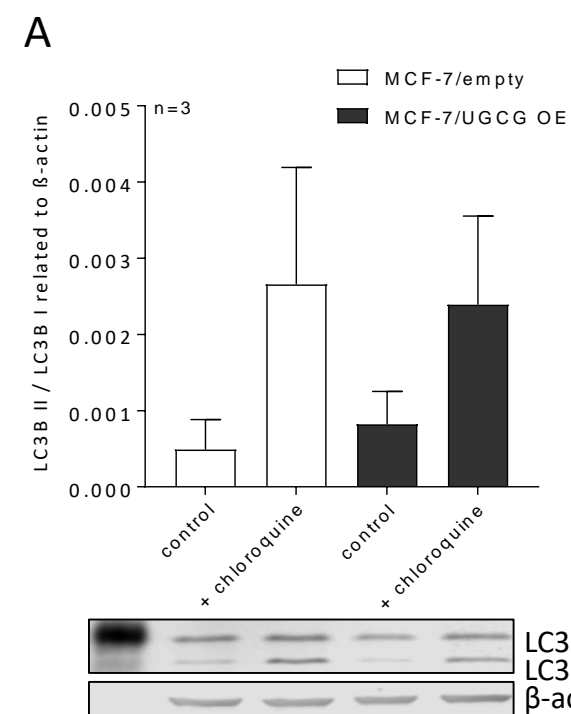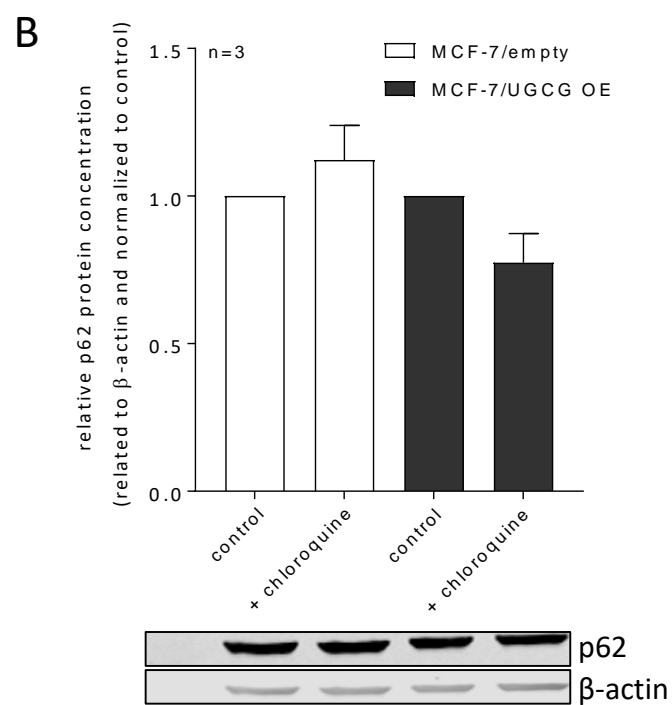

**UGCG overexpression impact on autophagy induction. A** Investigation of autophagic processes by determination of LC3B II/LC3B I ratio by Western blot analysis (control and 20  $\mu$ M chloroquine). The protein expression is related to the housekeeping protein  $\beta$ -actin. Data are presented as a mean of  $n=3 \pm$  SEM. One respective blot is displayed. **B** Analysis of p62 protein levels by Western blot analysis (control and 20  $\mu$ M chloroquine). The protein expression is related to the housekeeping protein  $\beta$ -actin. Data are represented as a mean of  $n=3 \pm$  SEM.

**Material and Methods: Analysis of autophagy induction by Western blot analysis.** For the analysis of autophagy, cells were treated with 20  $\mu$ M chloroquine for four hours to block autophagic flux. Untreated and chloroquine treated cells were harvested and resuspended in PhosphoSafe™ buffer (EMD Chemicals, Inc. La Jolla, USA) supplemented with 2 mM DTT (AppliChem GmbH, Darmstadt, Germany) and 1x Roche Complete (Roche, Mannheim, Germany), pH 7.4. After sonication and centrifugation, (14,000 x g, 10 min, 4 °C), the total protein concentration was determined by Bradford method. 40  $\mu$ g protein were separated electrophoretically by 12 % SDS-PAGE and then transferred onto nitrocellulose membranes. Blocking of the membrane was performed with Odyssey blocking reagent (LI-COR Biosciences, Bad Homburg, Germany) diluted 1:1 in PBST (90 minutes, room temperature). The primary antibody anti-LC3B (1:1000; rabbit polyclonal, #2775, Cell Signaling Technology, Danvers, USA) was incubated overnight at 4 °C, the anti-rabbit IRDye®680-conjugated secondary antibody (LI-COR Biosciences, Bad Homburg, Germany) was diluted 1:10,000 in blocking solution and incubated for one hour at room temperature.  $\beta$ -actin served as loading control (anti- $\beta$ -actin (mouse monoclonal, AC-15, #A5441, Sigma-Aldrich, Deisenhofen, Germany), 1:1000; 30 min at room temperature. Secondary antibody: anti-mouse IRDye®800-conjugated (LI-COR Biosciences, Bad Homburg, Germany), diluted 1:10,000 in blocking solution, 1 h at room temperature). Anti-p62 (mouse monoclonal, ab56416 Abcam, Cambridge, UK) was diluted 1:500 and incubated at 4 °C over night. Anti-mouse IRDye®680 (LI-COR Biosciences, Bad Homburg, Germany; 1:10,000 in blocking solution, 90 min, room temperature) served as secondary antibody. Densitometric analysis of the blots was performed with Image Studio Lite Software (LI-COR, Biosciences, Bad Homburg, Germany).

A

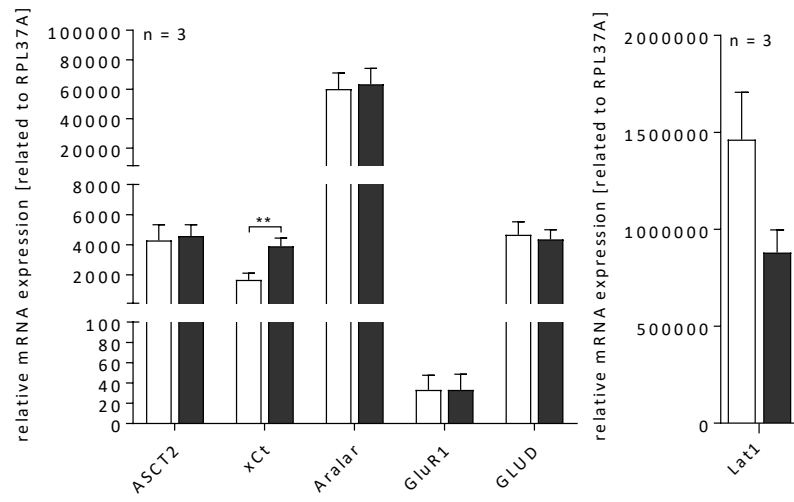

B

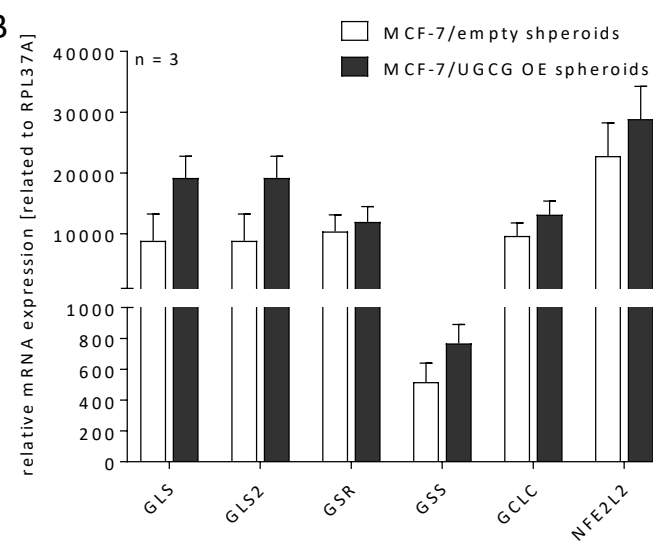

**Analysis of mRNA expression of glutamine metabolizing enzymes and transporters by qRT-PCR in 3D-spheroids of MCF-7 cells.** **A** mRNA expression analysis of the transporters alanine-serine-cysteine transporter 2 (ASCT2), glutamate/cystine antiporter (xCT), mitochondrial aspartate-glutamate-carrier (Aralar), glutamate carrier (GluR1), glutamate dehydrogenase (GLUD) and B L-type amino acid transporter 1 (Lat1) related to the housekeeping gene RPL37A. Data are presented as a mean of  $n=3 \pm \text{SEM}$ . Unpaired t test with Welch's correction. **B** mRNA expression analysis of the GSH synthesis key enzymes glutaminase (GLS) and GLS2, glutathione reductase (GSR), glutathione synthase (GSS), glutamate-cysteine-ligase (GCLC) and the transcription factor Nuclear factor (erythroid-derived 2)-like 2 (NFE2L2) related to the housekeeping gene RPL37A. Data are presented as a mean of  $n=3 \pm \text{SEM}$ . Unpaired t test with Welch's correction. \*\* $p \leq 0.01$ .

#### Material and Methods: Culture and of 3D-spheroids.

For mRNA analysis, about 120 spheroids of MCF-7/empty and MCF-7/UGCG OE cells were grown. For each spheroid, 5000 cells were seeded in 150  $\mu\text{l}$  media in 1.5 % agarose-precoated wells of a 96-well plate. After seeding, the 96-well plates were centrifuged (5000 rcf, 5 min, room temperature) and subsequently incubated for four days at 37 °C and 5 %  $\text{CO}_2$ . Spheroids were harvested with a low-binding pipette tip and transferred into a reaction tube on ice. After washing with 1 x DPBS, spheroids were lysed using accutase solution (Sigma-Aldrich, St. Louis, Missouri, USA) (30 min incubation at 37 °C). Centrifugation at 500 rcf for 5 minutes pellets the cells, which were proceed as described in chapter 6.



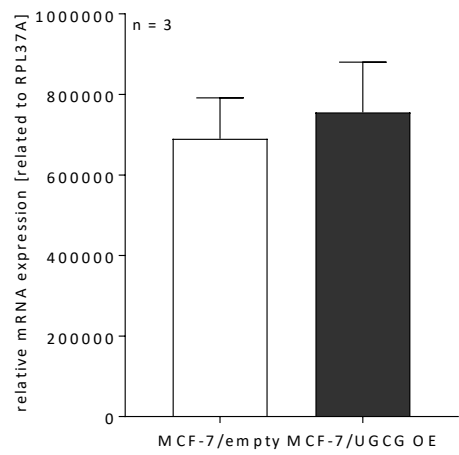

**Influence of UGCG overexpression on PKM mRNA expression.** The mRNA expression of the pyruvate kinase M1/2 (PKM) is related to the housekeeping gene RPL37A. Data are presented as a mean of  $n = 3 \pm \text{SEM}$ .

**Material and Methods:** qRT-PCR analysis was conducted as described in chapter 6. Primers (Forward 5' → 3': cgctggacattgattca , Reverse 5' → 3': gttcagacgagccacatt, 132 bp amplicon length) were purchased from Eurofins (Luxembourg, Luxembourg).

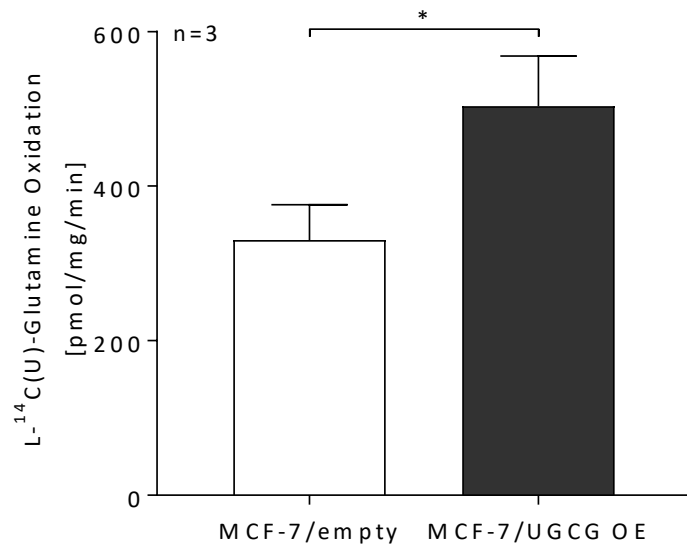

**Influence of UGCG overexpression on glutamine oxidation.** <sup>14</sup>C-glutamine oxidation was measured capturing <sup>14</sup>CO<sub>2</sub>. Data are presented as a mean of n = 3 ± SEM.

**Material and Methods: Substrate Competition Assay.**

Tracer measurements were performed as described in *Metabolic Vulnerabilities in Endometrial Cancer* Frances L. Byrne<sup>1,2</sup>, Ivan K.H. Poon<sup>3,4</sup>, Susan C. Modesitt<sup>5</sup>, Jose L. Tomsig<sup>1</sup>, Jenny D.Y. Chow<sup>1</sup>, Marin E. Healy<sup>1</sup>, William D. Baker<sup>5</sup>, Kristen A. Atkins<sup>6</sup>, Johnathan M. Lancaster<sup>7</sup>, Douglas C. Marchion<sup>7</sup>, Kelle H. Moley<sup>8</sup>, Kodi S. Ravichandran<sup>3,9</sup>, Jill K. Slack-Davis<sup>3,10</sup>, and Kyle L. Hoehn<sup>1,2,10,11</sup>. Briefly, 1.5 × 10<sup>4</sup> cells/24 well were seeded and incubated in Krebs Ringer Phosphate (KRP) nutrient buffer containing L[<sup>14</sup>C(U)]-glutamic acid. To quantify glutamine oxidation, media was acidified and evolved <sup>14</sup>CO<sub>2</sub> trapped via reaction with 0.1 ml KOH before liquid scintillation spectrometry. To quantify tracer incorporation into cellular lipids, a chloroform–methanol (2:1 vol./vol.) extraction was performed and fractions assayed by scintillation spectrometry.
